# Supplementary material
Source: PubMed Central journal article supplement (PMC3146049)
Supplement: NIHMS36024-supplement-01.pdf [file NIHMS36024-supplement-01.pdf]

## Supplementary Data for Hayes et al.

Consists of Tables S1 to S4, Figure S1, and supplementary references.

**Table S1. Psi-BLAST results with BLOC-1 sub-units.**

### Blos1

NP\_001478.1 (*H. sapiens*) – iteration 3 (132 hits, converged)

| Posn | sequence ref | species                        | score | e-value |
|------|--------------|--------------------------------|-------|---------|
| 6.   | NP_001478.1  | <i>Homo sapiens</i>            | 160   | 2e-38   |
| 35.  | NP_725401.2  | <i>Drosophila melanogaster</i> | 138   | 1e-31   |
| 43.  | NP_499262.1  | <i>Caenorhabditis elegans</i>  | 135   | 7e-31   |
| 54.  | NP_180592.1  | <i>Arabidopsis thaliana</i>    | 131   | 8e-30   |
| 130. | XP_500764.2  | <i>Yarrowia lipolytica</i>     | 68.4  | 1e-10   |
| 141. | XP_451660.1  | <i>Kluyveromyces lactis</i>    | 38.7  | 0.092   |

XP\_451660.1 (*K. lactis*, see above) – iteration 2 (7 hits, converged)

| Posn | sequence ref           | species                          | score | e-value |
|------|------------------------|----------------------------------|-------|---------|
| 1.   | XP_451660.1            | <i>Kluyveromyces lactis</i>      | 134   | 1e-30   |
| 2.   | XP_002553358.1         | <i>Lachancea thermotolerans</i>  | 129   | 4e-29   |
| 3.   | NP_013512.1 (YLR408Cp) | <i>Saccharomyces cerevisiae</i>  | 118   | 7e-26   |
| 4.   | XP_449775.1            | <i>Candida glabrata</i>          | 117   | 1e-25   |
| 5.   | XP_001646567.1         | <i>Vanderwaltozyma polyspora</i> | 112   | 4e-24   |
| 6.   | XP_002495505.1         | <i>Zygosaccharomyces rouxii</i>  | 112   | 4e-24   |
| 7.   | NP_984939.1            | <i>Ashbya gossypii</i>           | 103   | 2e-21   |
| 16.  | ACO52029.1             | <i>Rana catesbeiana</i>          | 36.2  | 0.47    |
| 34.  | XP_500764.2            | <i>Yarrowia lipolytica</i>       | 33.5  | 3.5     |

NP\_013512.1 (YLR408Cp, *S cerevisiae*) – iteration 4 (61 hits)

N.B. converged at iteration 8, with 145 hits

| Posn | sequence ref           | species                         | score | e-value |
|------|------------------------|---------------------------------|-------|---------|
| 1.   | NP_013512.1 (YLR408Cp) | <i>Saccharomyces cerevisiae</i> | 154   | 1e-36   |
| 24.  | XP_451660.1            | <i>Kluyveromyces lactis</i>     | 99.7  | 4e-20   |
| 44.  | XP_500764.2            | <i>Yarrowia lipolytica</i>      | 53.5  | 3e-06   |
| 54.  | NP_499262.1            | <i>Caenorhabditis elegans</i>   | 45.0  | 0.001   |
| 62.  | XP_509120.1            | <i>Pan troglodytes</i>          | 42.7  | 0.005   |
| 82.  | NP_001478.1            | <i>Homo sapiens</i>             | 39.7  | 0.054   |
| 140. | NP_725401.2            | <i>Drosophila melanogaster</i>  | 35.4  | 0.79    |
| 202. | NP_180592.1            | <i>Arabidopsis thaliana</i>     | 3.3   | 6.8     |

### Snapi

YNL086Wp iteration 4 (12 hits, converged)

| Posn | sequence ref           | species                         | score | e-value |
|------|------------------------|---------------------------------|-------|---------|
| 1.   | NP_014313.1 (YNL086Wp) | <i>Saccharomyces cerevisiae</i> | 122   | 4e-27   |
| 2.   | XP_452820.1            | <i>Kluyveromyces lactis</i>     | 104   | 2e-21   |
| 12.  | XP_002494050.1         | <i>Pichia pastoris</i>          | 77.0  | 3e-13   |

### Cno

YDR357Cp – iterations 4 (51 hits, converged)

| Posn | sequence ref          | species                         | score | e-value |
|------|-----------------------|---------------------------------|-------|---------|
| 2.   | EDN60686.1 (YDR357Cp) | <i>Saccharomyces cerevisiae</i> | 129   | 4e-29   |
| 31.  | XP_454923.1           | <i>Kluyveromyces lactis</i>     | 105   | 1e-21   |
| 46.  | XP_503339.2           | <i>Yarrowia lipolytica</i>      | 92.0  | 8e-18   |
| 51.  | XP_389585.1           | <i>Gibberella zeae</i>          | 82.3  | 6e-15   |

**Vab2** – iteration 6 (17 hits, converged)

| Posn | sequence ref        | species                         | score | e-value |
|------|---------------------|---------------------------------|-------|---------|
| 1.   | NP_010911.1 (Vab2p) | <i>Saccharomyces cerevisiae</i> | 266   | 3e-69   |
| 5.   | XP_504134.1         | <i>Yarrowia lipolytica</i>      | 165   | 5e-39   |
| 17.  | XP_001384198.2      | <i>Scheffersomyces stipitis</i> | 117   | 2e-24   |

**YKL061Wp (Bli1p)** – iteration 2 (6 hits, converged)

| Posn | sequence ref          | species                         | score | e-value |
|------|-----------------------|---------------------------------|-------|---------|
| 1.   | EEU07430.1 (YKL061Wp) | <i>Saccharomyces cerevisiae</i> | 120   | 6e-26   |
| 6.   | XP_448843.1           | <i>Candida glabrata</i>         | 87.9  | 3e-16   |

**YGL079Wp (Kxd1p)** – iteration 5\* (142 hits)

| Posn | sequence ref           | species                         | score | e-value |
|------|------------------------|---------------------------------|-------|---------|
| 16.  | NP_011436.1 (YGL079Wp) | <i>Saccharomyces cerevisiae</i> | 142   | 1e-32   |
| 26.  | AAQ13622.1             | <i>Homo sapiens</i>             | 136   | 9e-31   |
| 64.  | NP_648580.1            | <i>Drosophila melanogaster</i>  | 125   | 1e-27   |
| 101. | NP_504831.1            | <i>Caenorhabditis elegans</i>   | 101   | 4e-20   |
| 126. | NP_189557.2            | <i>Arabidopsis thaliana</i>     | 84.2  | 4e-15   |

\* from iteration 6, non-KxDL proteins align with  $p < 0.001$

**Table S2. HHpred and HHsenser results with BLOC-1 sub-units**

Pair-wise comparison of profile hidden Markov models (HMMs) was carried out (HHpred, extended with HHsenser in some cases) with the indicated seed. Data shown for top hits: full length (Len), the calculated probability it shares the same structure as the seed, (Prob - which includes calculated secondary structure), the average number of false positives expected to score better than the hit (e-value - excludes secondary structure), the ranges of residues in the HMM that match for both the seed (Query) and the hit (Template), and the number of columns aligned between seed and hit HMMs (cols).

**Blos1 HHpred**

| # Hit                       | Len | Prob | e-value | Query  | Template | Cols |
|-----------------------------|-----|------|---------|--------|----------|------|
| 1 NP_001478.1 Blos1 (Hs)    | 125 | 100  | <1e-50  | 1-125  | 1-125    | 125  |
| 2 NP_499262.1 Blos1 (Ce)    | 129 | 100  | <1e-50  | 5-125  | 1-121    | 121  |
| 3 NP_180592.1 Blos1 (At)    | 152 | 100  | <1e-50  | 2-120  | 34-152   | 119  |
| 4 NP_725401.1 Blos1 (Dm)    | 143 | 100  | <1e-50  | 5-125  | 1-121    | 121  |
| 5 NP_013512.1 YLR408Cp (Sc) | 122 | 96.9 | 0.0042  | 77-121 | 77-121   | 45   |

**Blos1 → HHsenser**

| # Hit                       | Len | Prob | e-value | Query  | Template | Cols |
|-----------------------------|-----|------|---------|--------|----------|------|
| 1 NP_001478.1 Blos1 (Hs)    | 125 | 100  | <1e-50  | 1-125  | 1-125    | 125  |
| 2 NP_499262.1 Blos1 (Ce)    | 129 | 100  | <1e-50  | 5-125  | 1-121    | 121  |
| 3 NP_180592.1 Blos1 (At)    | 152 | 100  | 2.8e-45 | 1-120  | 33-152   | 120  |
| 4 NP_725401.1 Blos1 (Dm)    | 143 | 100  | 3.8e-44 | 5-124  | 1-120    | 120  |
| 5 NP_013512.1 YLR408Cp (Sc) | 122 | 97.5 | 0.00046 | 49-119 | 46-119   | 71   |

**YLR408Cp HHpred**

| # Hit                       | Len | Prob | e-value | Query  | Template | Cols |
|-----------------------------|-----|------|---------|--------|----------|------|
| 1 NP_013512.1 YLR408Cp (Sc) | 122 | 100  | <1e-50  | 1-122  | 1-122    | 122  |
| 2 NP_499262.1 Blos1 (Ce)    | 129 | 98.0 | 0.00013 | 35-121 | 38-117   | 80   |
| 3 NP_001478.1 Blos1 (Hs)    | 125 | 97.8 | 0.00021 | 48-120 | 51-120   | 70   |
| 4 NP_180592.1 Blos1 (At)    | 152 | 97.0 | 0.01    | 14-119 | 21-151   | 104  |
| 5 NP_725401.1 Blos1 (Dm)    | 143 | 96.9 | 0.012   | 36-119 | 39-115   | 77   |

**YLR408Cp → HHsenser**

| # Hit                       | Len | Prob | e-value | Query  | Template | Cols |
|-----------------------------|-----|------|---------|--------|----------|------|
| 1 NP_013512.1 YLR408Cp (Sc) | 122 | 100  | <1e-50  | 1-122  | 1-122    | 122  |
| 2 NP_499262.1 Blos1 (Ce)    | 129 | 100  | 6.8e-29 | 39-122 | 38-118   | 81   |
| 3 NP_001478.1 Blos1 (Hs)    | 125 | 100  | 1.6e-28 | 37-121 | 40-121   | 82   |
| 4 NP_180592.1 Blos1 (At)    | 152 | 100  | 4.7e-28 | 14-120 | 21-152   | 104  |
| 5 NP_725401.1 Blos1 (Dm)    | 143 | 99.9 | 2.4e-27 | 37-121 | 36-117   | 82   |

**Snapin HHpred**

| # Hit                       | Len | Prob | e-value | Query  | Template | Cols |
|-----------------------------|-----|------|---------|--------|----------|------|
| 1 NP_036569.1 snapin (Hs)   | 136 | 100  | <1e-50  | 1-136  | 1-136    | 136  |
| 2 NP_722835.1 snapin (Dm)   | 134 | 100  | 8.7e-44 | 21-133 | 22-134   | 113  |
| 3 NP_500721.1 snapin (Ce)   | 122 | 100  | 4.1e-43 | 17-134 | 5-120    | 116  |
| 4 NP_178028.2 snapin (At)   | 138 | 99.9 | 4.7e-24 | 20-122 | 32-133   | 102  |
| 8 NP_014313.1 YNL086Wp (Sc) | 102 | 95.8 | 0.46    | 30-110 | 21-101   | 81   |

**Snapin → HHsenser**

| # Hit                       | Len | Prob | e-value | Query  | Template | Cols |
|-----------------------------|-----|------|---------|--------|----------|------|
| 1 NP_036569.1 snapin (Hs)   | 136 | 100  | 2.2e-40 | 1-136  | 1-136    | 136  |
| 2 NP_722835.1 snapin (Dm)   | 134 | 100  | 3.9e-34 | 10-128 | 11-129   | 119  |
| 3 NP_500721.1 snapin (Ce)   | 122 | 100  | 1.4e-31 | 14-136 | 2-122    | 121  |
| 5 NP_178028.2 snapin (At)   | 138 | 99.8 | 1.1e-19 | 6-127  | 18-138   | 121  |
| 7 NP_014313.1 YNL086Wp (Sc) | 102 | 97.7 | 0.0033  | 12-110 | 3-101    | 99   |

**YLR086Wp** HHpred

| # Hit                       | Len | Prob | e-value | Query  | Template | Cols |
|-----------------------------|-----|------|---------|--------|----------|------|
| 1 NP_014313.1 YNL086Wp (Sc) | 102 | 100  | <1e-50  | 1-102  | 1-102    | 102  |
| 2 NP_036569.1 snapin (Hs)   | 136 | 95.6 | 0.57    | 19-101 | 28-110   | 79   |
| 3 NP_500721.1 snapin (Ce)   | 122 | 95.3 | 1.9     | 20-101 | 17-97    | 81   |
| 4 NP_722835.1 snapin (Dm)   | 134 | 94.6 | 1.6     | 19-101 | 29-111   | 79   |

**YLR086Wp** → HHsenser

| # Hit                       | Len | Prob | e-value | Query  | Template | Cols |
|-----------------------------|-----|------|---------|--------|----------|------|
| 1 NP_014313.1 YNL086Wp (Sc) | 102 | 99.9 | 1.6e-25 | 1-102  | 1-102    | 102  |
| 2 NP_036569.1 snapin (Hs)   | 136 | 97.7 | 0.0032  | 9-101  | 18-110   | 93   |
| 3 NP_722835.1 snapin (Dm)   | 134 | 97.1 | 0.027   | 21-101 | 31-111   | 81   |
| 4 NP_500721.1 snapin (Ce)   | 122 | 96.8 | 0.086   | 20-101 | 17-97    | 81   |

**Cno** (Dictyostelium discoideum) HHpred\*

| # Hit                       | Len | Prob | e-value | Query  | Template | Cols |
|-----------------------------|-----|------|---------|--------|----------|------|
| 1 NP_060836.1 cno (Hs)      | 217 | 100  | <1e-50  | 3-174  | 56-216   | 161  |
| 3 NP_648414.1 cno (Dm)      | 169 | 100  | <1e-50  | 8-173  | 5-165    | 160  |
| 6 NP_495247.1 T24H7.4 (Ce)  | 106 | 96.5 | 0.18    | 12-106 | 8-103    | 94   |
| 7 NP_010644.1 YDR357Cp (Sc) | 122 | 96.3 | 1.1     | 2-108  | 15-116   | 99   |

(\*Breast Carcinoma Amplified Sequence-4 isoforms x3 excluded, as this human protein is so similar to cno)

**Cno** (Homo sapiens) HHpred\*

| # Hit                       | Len | Prob | e-value | Query  | Template | Cols |
|-----------------------------|-----|------|---------|--------|----------|------|
| 1 NP_060836.1 cno (Hs)      | 217 | 100  | <1e-50  | 1-217  | 1-217    | 217  |
| 3 NP_648414.1 cno (Dm)      | 169 | 100  | <1e-50  | 61-217 | 5-167    | 156  |
| 6 NP_010644.1 YDR357Cp (Sc) | 122 | 96.2 | 1.3     | 48-161 | 8-116    | 109  |
| 8 NP_495247.1 T24H7.4 (Ce)  | 106 | 95.9 | 0.64    | 82-159 | 27-103   | 77   |

**T24H7.4** (Caenorhabditis elegans) HHpred

| # Hit                       | Len | Prob | e-value | Query  | Template | Cols |
|-----------------------------|-----|------|---------|--------|----------|------|
| 1 NP_495247.1 T24H7.4 (Ce)  | 106 | 100  | <1e-50  | 1-106  | 1-106    | 106  |
| 2 NP_010644.1 YDR357Cp (Sc) | 122 | 92.8 | 0.58    | 14-106 | 1-117    | 93   |
| 3 NP_648414.1 cno (Dm)      | 169 | 90.7 | 0.91    | 1-106  | 1-105    | 103  |
| 4 NP_060836.1 cno (Hs)      | 217 | 89.3 | 1.8     | 1-106  | 53-162   | 104  |

**YDR357Cp** HHpred

| # Hit                       | Len | Prob | e-value | Query  | Template | Cols |
|-----------------------------|-----|------|---------|--------|----------|------|
| 1 NP_010644.1 YDR357Cp (Sc) | 122 | 100  | <1e-50  | 1-122  | 1-122    | 122  |
| 2 NP_500377.1 DUF2365 (Ce)  | 157 | 97.8 | 0.013   | 6-111  | 42-152   | 104  |
| 3 NP_060092.1 DUF2365 (Hs)  | 223 | 96.7 | 0.23    | 17-109 | 123-220  | 91   |
| 4 NP_612037.1 DUF2365 (Dm)  | 302 | 95.8 | 0.44    | 16-109 | 202-300  | 92   |

**DUF2365** (Caenorhabditis elegans, Y37E11B.3) HHpred

| # Hit                       | Len | Prob | e-value | Query  | Template | Cols |
|-----------------------------|-----|------|---------|--------|----------|------|
| 1 NP_500377.1 DUF2365 (Ce)  | 157 | 100  | <1e-50  | 1-157  | 1-157    | 157  |
| 2 NP_060092.1 DUF2365 (Hs)  | 223 | 100  | <1e-50  | 11-152 | 61-222   | 142  |
| 3 NP_612037.1 DUF2365 (Dm)  | 302 | 100  | <1e-50  | 12-152 | 128-302  | 141  |
| 4 NP_194064.1 DUF2365 (At)  | 259 | 99.3 | 5.6e-11 | 55-127 | 43-115   | 73   |
| 5 NP_010644.1 YDR357Cp (Sc) | 122 | 97.9 | 0.0062  | 41-151 | 5-110    | 104  |

**Table S3. Sequences used for Blo1/snapin consensuses, and cno line-up & Tables S1/S2**

The gene identifying (GI) number and species of sequences used to make consensuses and line-ups.

| <b>Blo1</b>                 |                               | <b>Snapin (x38)</b> |                                       | <b>Cno / cno-like (x24 each, + length)</b> |                                           |
|-----------------------------|-------------------------------|---------------------|---------------------------------------|--------------------------------------------|-------------------------------------------|
| <u>GI</u>                   | <u>Species</u>                | <u>GI</u>           | <u>Species</u>                        | <u>GI</u>                                  | <u>Species</u>                            |
| <b>ANIMALS/PLANTS (x35)</b> |                               |                     |                                       |                                            |                                           |
| 113195616                   | Danio rerio                   | 148228503           | Xenopus laevis                        | 118086704                                  | Gallus gallus 214                         |
| 115692166                   | Strongylocentrotus purpuratus | 148669506           | Mus musculus                          | 149244312                                  | Lodderomyces elongisporus 161             |
| 116057994                   | Ostreococcus tauri            | 156365612           | Nematostella vectensis                | 156350495                                  | Nematostella vectensis 192                |
| 118398939                   | Tetrahymena thermophila       | 156843445           | Vanderwaltozyma polyspora             | 156846164                                  | Vanderwaltozyma polyspora 116             |
| 123449313                   | Trichomonas vaginalis         | 157104298           | Aedes aegypti                         | 157136111                                  | Aedes aegypti 172                         |
| 148235775                   | Xenopus laevis                | 158296992           | Anopheles gambiae                     | 158294340                                  | Anopheles gambiae 184                     |
| 15227736                    | Arabidopsis thaliana          | 167537388           | Monosiga brevicollis                  | 167538428                                  | Monosiga brevicollis 265                  |
| 156391143                   | Nematostella vectensis        | 168035684           | Physcomitrella                        | 170045619                                  | Culex quinquefasciatus 193                |
| 157118066                   | Aedes aegypti                 | 170585680           | Brugia malayi                         | 171684445                                  | Podospora anserina 172                    |
| 158301499                   | Anopheles gambiae             | 17538398            | Caenorhabditis elegans                | 17536485                                   | Caenorhabditis elegans 106<br>(T24H7.4)   |
| 170044487                   | Culex quinquefasciatus        | 189239210           | Tribolium castaneum                   | 189198760                                  | Pyrenophora tritici 140                   |
| 170590036                   | Brugia malayi                 | 195999888           | Trichoplax adhaerens                  | 193582437                                  | Acyrtosiphon pisum 164                    |
| 196002611                   | Trichoplax adhaerens          | 198418879           | Ciona intestinalis                    | 19526908                                   | Mus musculus 215                          |
| 198421104                   | Ciona intestinalis            | 225462195           | Vitis vinifera                        | 196003246                                  | Trichoplax adhaerens 177                  |
| 218186731                   | Oryza sativa Indica           | 226502642           | Zea mays                              | 198429992                                  | Ciona intestinalis 175                    |
| 221101349                   | Hydra magnipapillata          | 238882874           | Candida albicans                      | 210075837                                  | Yarrowia lipolytica 116                   |
| 224124784                   | Populus trichocarpa           | 240848775           | Acyrtosiphon pisum                    | 21356449                                   | Drosophila melanogaster 169               |
| 226459052                   | Micromonas pusilla            | 24581212            | Drosophila melanogaster               | 221112508                                  | Hydra magnipapillata 177                  |
| 226484660                   | Schistosoma japonicum         | 254567451           | Pichia pastoris                       | 226458182                                  | Micromonas pusilla 188                    |
| 229367874                   | Anoplopora fimbria            | 254580643           | Zygosaccharomyces rouxii              | 254573206                                  | Pichia pastoris 125                       |
| 240849438                   | Acyrtosiphon pisum            | 255633100           | Glycine max                           | 254584092                                  | Zygosaccharomyces rouxii 108              |
| 255627133                   | Glycine max                   | 255718239           | Lachancea thermotolerans              | 255717240                                  | Lachancea thermotolerans 131              |
| 260800377                   | Branchiostoma floridae        | 256086052           | Schistosoma mansoni                   | 255951050                                  | Penicillium chrysogenum 168               |
| 281210911                   | Polysphondylium pallidum      | 260810887           | Branchiostoma floridae                | 256727642                                  | Nectria haematococca 158                  |
| 281363363                   | Drosophila melanogaster       | 262098737           | Phytophthora infestans                | 258569080                                  | Uncinocarpus reesii 167                   |
| 290997912                   | Naegleria gruberi             | 281204356           | Polysphondylium pallidum              | 260944060                                  | Clavispora lusitaniae 127                 |
| 291228563                   | Saccoglossus kowalevskii      | 290985016           | Naegleria gruberi                     | 261353299                                  | Verticillium albo-atrum 189               |
| 300169437                   | Selaginella moellendorffii    | 294659996           | Debaryomyces hansenii                 | 262112084                                  | Phytophthora infestans 151                |
| 31980697                    | Mus musculus                  | 297726007           | Oryza sativa Japonica                 | 270003414                                  | Tribolium castaneum 125                   |
| 4503955                     | Homo sapiens                  | 300172237           | Selaginella moellendorffii            | 281207674                                  | Polysphondylium pallidum 192              |
| 47220703                    | Tetraodon nigroviridis        | 3152584             | Arabidopsis thaliana                  | 290987028                                  | Naegleria gruberi 198                     |
| 66814098                    | Dictyostelium discoideum      | 45191013            | Ashbya gossypii                       | 294659803                                  | Debaryomyces hansenii 124                 |
| 67479027                    | Entamoeba histolytica         | 50291031            | Candida glabrata                      | 295666097                                  | Paracoccidioides brasiliensis 171         |
| 71416763                    | Trypanosoma cruzi             | 50305719            | Kluyveromyces lactis                  | 296425892                                  | Tuber melanosporum 151                    |
| 91090694                    | Tribolium castaneum           | 66811200            | Dictyostelium discoideum              | 39971113                                   | Magnaporthe oryzae 188                    |
| <b>FUNGI (x27)</b>          |                               |                     |                                       |                                            |                                           |
| 116199867                   | Chaetomium globosum           | 6912674             | Homo sapiens                          | 45190845                                   | Ashbya gossypii 129                       |
| 119190001                   | Coccidioides immitis          | 71064114            | Saccharomyces cerevisiae<br>(YNL086W) | 46135787                                   | Gibberella zeae 180                       |
| 119481547                   | Neosartorya fischeri          |                     |                                       | 47208563                                   | Tetraodon nigroviridis 231                |
| 145608262                   | Magnaporthe oryzae            |                     |                                       | 50309819                                   | Kluyveromyces lactis 124                  |
| 146422819                   | Meyerozyma guilliermondii     |                     |                                       | 51011035                                   | Danio rerio 236                           |
| 156043473                   | Sclerotinia sclerotiorum      |                     |                                       | 6320564                                    | Saccharomyces cerevisiae 122<br>(YDR357C) |
| 156847365                   | Vanderwaltozyma polyspora     |                     |                                       | 66813954                                   | Dictyostelium discoideum 262              |
| 169624786                   | Phaeosphaeria nodorum         |                     |                                       | 67903472                                   | Aspergillus nidulans 167                  |
| 171688892                   | Podospora anserina            |                     |                                       | 68468893                                   | Candida albicans 158                      |
| 189198860                   | Pyrenophora tritici           |                     |                                       | 76779596                                   | Xenopus laevis 221                        |
| 210075280                   | Yarrowia lipolytica           |                     |                                       | 85113784                                   | Neurospora crassa 181                     |
| 242819386                   | Talaromyces stipitatus        |                     |                                       | 8922952                                    | Homo sapiens 217                          |
| 255714152                   | Lachancea thermotolerans      |                     |                                       | isotig09812                                | Patiria miniata 197                       |
| 255933021                   | Penicillium chrysogenum       |                     |                                       |                                            |                                           |
| 256735382                   | Nectria haematococca          |                     |                                       |                                            |                                           |
| 258565601                   | Uncinocarpus reesii 1704      |                     |                                       |                                            |                                           |
| 260949381                   | Clavispora lusitaniae         |                     |                                       |                                            |                                           |
| 261357041                   | Verticillium albo-atrum       |                     |                                       |                                            |                                           |
| 294656654                   | Debaryomyces hansenii         |                     |                                       |                                            |                                           |
| 295675039                   | Paracoccidioides brasiliensis |                     |                                       |                                            |                                           |
| 296417511                   | Tuber melanosporum Mel28      |                     |                                       |                                            |                                           |
| 45190685                    | Ashbya gossypii               |                     |                                       |                                            |                                           |
| 46107490                    | Gibberella zeae               |                     |                                       |                                            |                                           |
| 50303437                    | Kluyveromyces lactis          |                     |                                       |                                            |                                           |
| 67540292                    | Aspergillus nidulans          |                     |                                       |                                            |                                           |
| 68482218                    | Candida albicans              |                     |                                       |                                            |                                           |
| 85079168                    | Neurospora crassa             |                     |                                       |                                            |                                           |

**Table S4. Documented interactions within Vab2 complex**

Documented interactions shown in Fig. 4 between the six components of the Vab2 complex identified by Krogan *et al.* (2006). In that paper, raw mass spectrometry data were analysed to produce a score of the probability that the interaction is genuine (= "prob"). ~7,100 core interactions scored over a threshold of  $p = 0.273$ . One interaction within this complex (Vab2p-Bli1p, indicated by ‡) was one of 7,000 further reactions that scored lower than the threshold – strength 0.261. Interactions that repeat one shown higher up the table are not numbered, with cross-referencing ("Xref") to the first occurrence indicated. References as indicated.

| #   | Bait  | interactor | prob   | Xref | ref |
|-----|-------|------------|--------|------|-----|
| 1.  | Vab2p | Cnl1p      | 0.896  |      | (1) |
| 2.  | Vab2p | Kxd1p      | 0.767  |      | (1) |
| 3.  | Vab2p | Bls1p      | 0.683  |      | (1) |
| 4.  | Vab2p | Snn1p      | 0.702  |      | (1) |
| 5.  | Vab2p | Bli1       | 0.261‡ |      | (1) |
| 6.  | Bls1p | Kxd1p      | 0.818  |      | (1) |
| 7.  | Bls1p | Snn1p      | 0.647  |      | (1) |
| 8.  | Cnl1p | Bli1p      | 0.748  |      | (1) |
| 9.  | Bli1p | Kxd1p      | 0.404  |      | (1) |
| 10. | Bli1p | Bls1p      | 0.286  |      | (1) |
| 11. | Kxd1p | Snn1p      |        |      | (2) |
| 12. | Snn1p | Bli1p      |        |      | (3) |
|     | Snn1p | Bli1p      |        | 12   | (4) |
| 13. | Cnl1p | Kxd1p      |        |      | (4) |
|     | Vab2p | Kxd1p      |        | 2    | (4) |
|     | Vab2p | Snn1p      |        | 4    | (4) |
|     | Bli1p | Snn1p      |        | 12   | (5) |
|     | Cnl1p | Kxd1p      |        | 13   | (5) |

**Supplementary Figures: Fig S1** (legend overleaf)

**A**

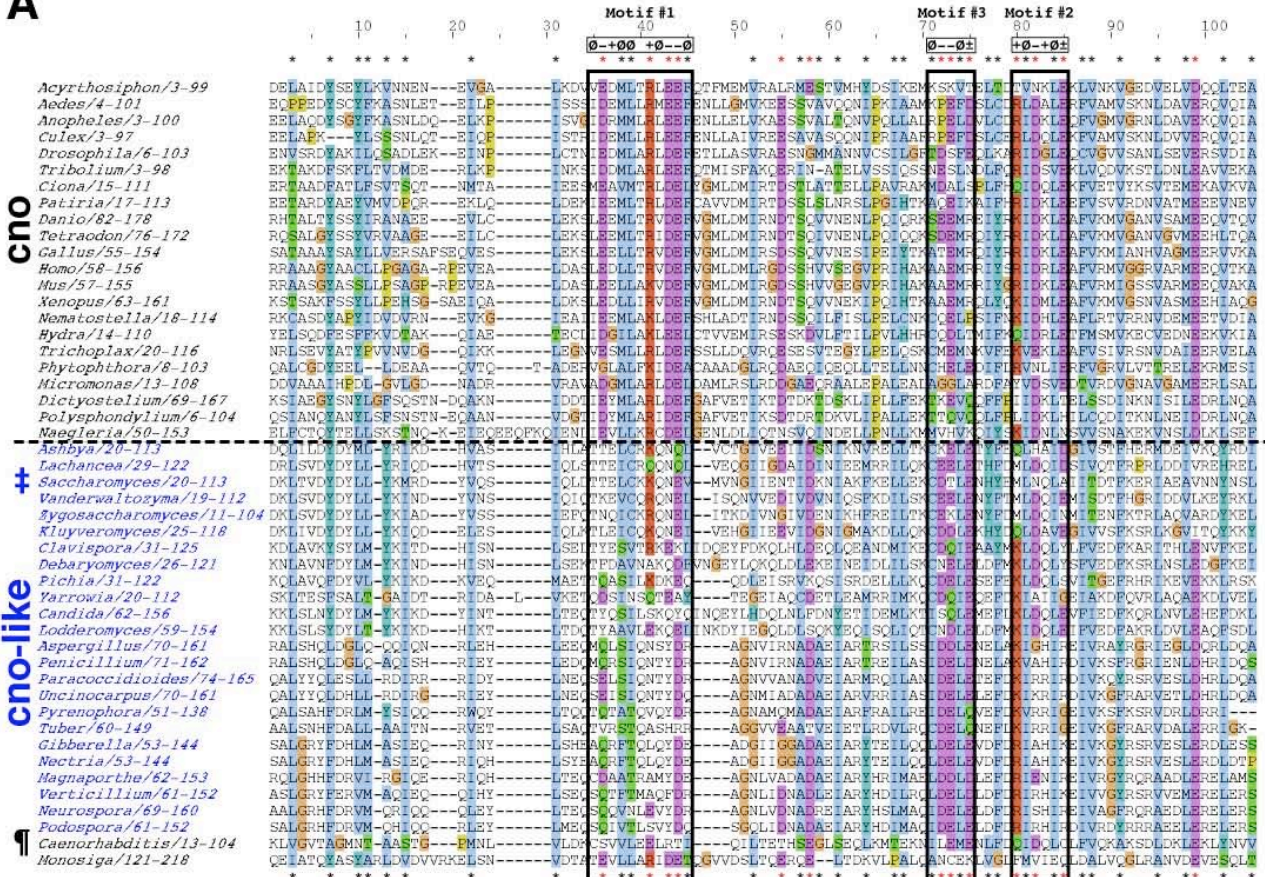

**B**

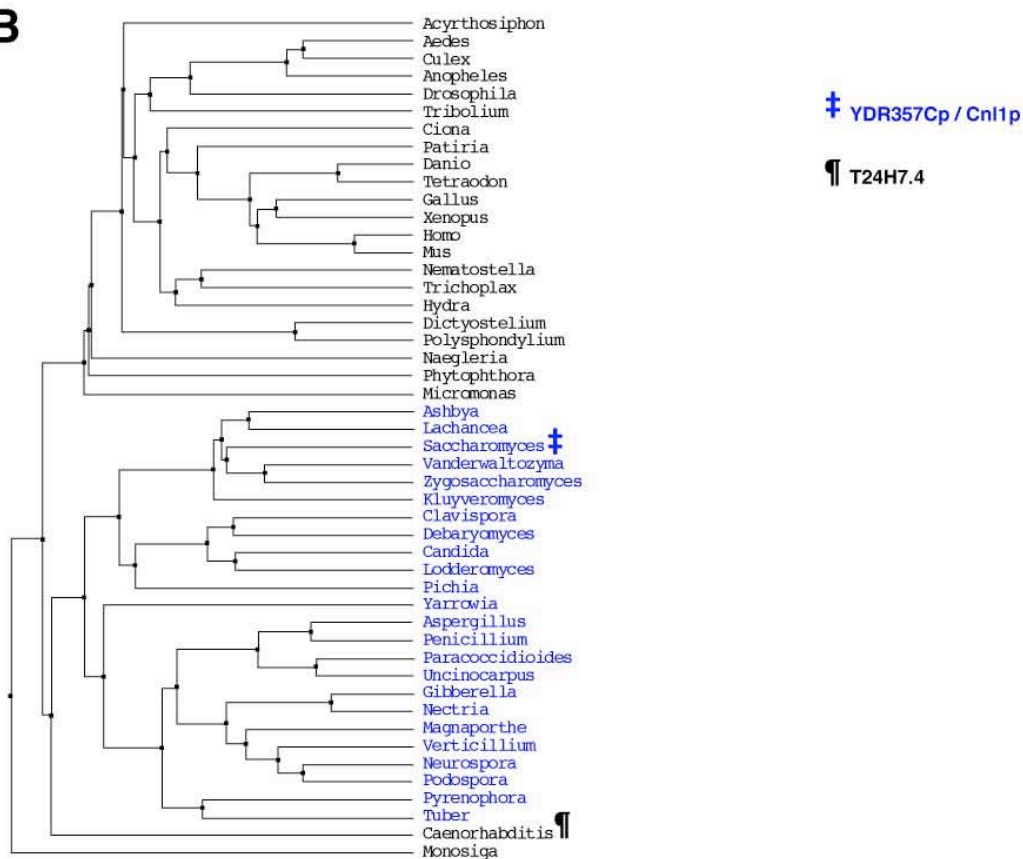

## Figure S1. Relationship between cno homologues and fungal cno-like proteins.

(A). 24 cno homologues (in black, including T24H7.4<sup>¶</sup>) and 24 fungal cno-like homologues (in blue, including YDR357Cp/Cnl1p<sup>‡</sup>) were sorted in Kalign by average distance using BLOSUM62. The figure shows the region of maximal alignment across a central block of ~100 amino acids. The dotted line indicates that the two families separated almost completely (but see B). Residues at conserved positions are coloured: hydrophobic (blue), negatively charged (purple), positively charged (red), hydrophilic (T/S/N/Q: green), and tyrosine and histidine (turquoise). Also coloured are all prolines (yellow) and glycines (pink). Highly conserved positions are also indicated by asterisks (above and below, black if hydrophobic, red if charged). In addition, each of the three proposed motifs corresponding to those in Fig. 3 (Motifs #1 and #2 identified in cno<sup>(6)</sup>, and Motif #3 identified in this study) are boxed, and summarized above, where “Ø” is hydrophobic, and “+” “-“ & “±” are charged positive, negative or both. Motif #1 is only poorly preserved from cno (top half) into cno-like sequences (bottom half), but Motifs #2 and #3 are well conserved across both groups of sequences.

(B). Tree of the regions shown in (A), showing species. Cno homologues in nematode<sup>¶</sup> and the unicellular flagellate *Monosiga* are intermediate in character between the other cno sequences and the fungal cno-like family, indicating that the two main groups of sequences might have derived from a single ancestor. Sequences are listed in Table S3.

## Supplementary References:

1. Krogan, NJ, et al. Global landscape of protein complexes in the yeast *Saccharomyces cerevisiae*. *Nature* 2006; 440:637-43.
2. Chin, CH, SH Chen, CW Ho, MT Ko, and CY Lin. A hub-attachment based method to detect functional modules from confidence-scored protein interactions and expression profiles. *BMC Bioinformatics* 2010; 11 Suppl 1:S25.
3. Uetz, P, et al. A comprehensive analysis of protein-protein interactions in *Saccharomyces cerevisiae*. *Nature* 2000; 403:623-7.
4. Ito, T, T Chiba, R Ozawa, M Yoshida, M Hattori, and Y Sakaki. A comprehensive two-hybrid analysis to explore the yeast protein interactome. *Proc Natl Acad Sci U S A* 2001; 98:4569-74.
5. Yu, H, et al. High-quality binary protein interaction map of the yeast interactome network. *Science* 2008; 322:104-10.
6. Cheli, VT and EC Dell'Angelica. Early origin of genes encoding subunits of biogenesis of lysosome-related organelles complex-1, -2 and -3. *Traffic* 2010; 11:579-86.
